# Supplementary material for: Effect of Black Tea Infusion on Physicochemical Properties, Antioxidant Capacity and Microstructure of Acidified Dairy Gel during Cold Storage
Source: MDPI journal article supplement (doi:10.3390/foods9060831), 2020-06-25
Supplement: s1 [file s1]

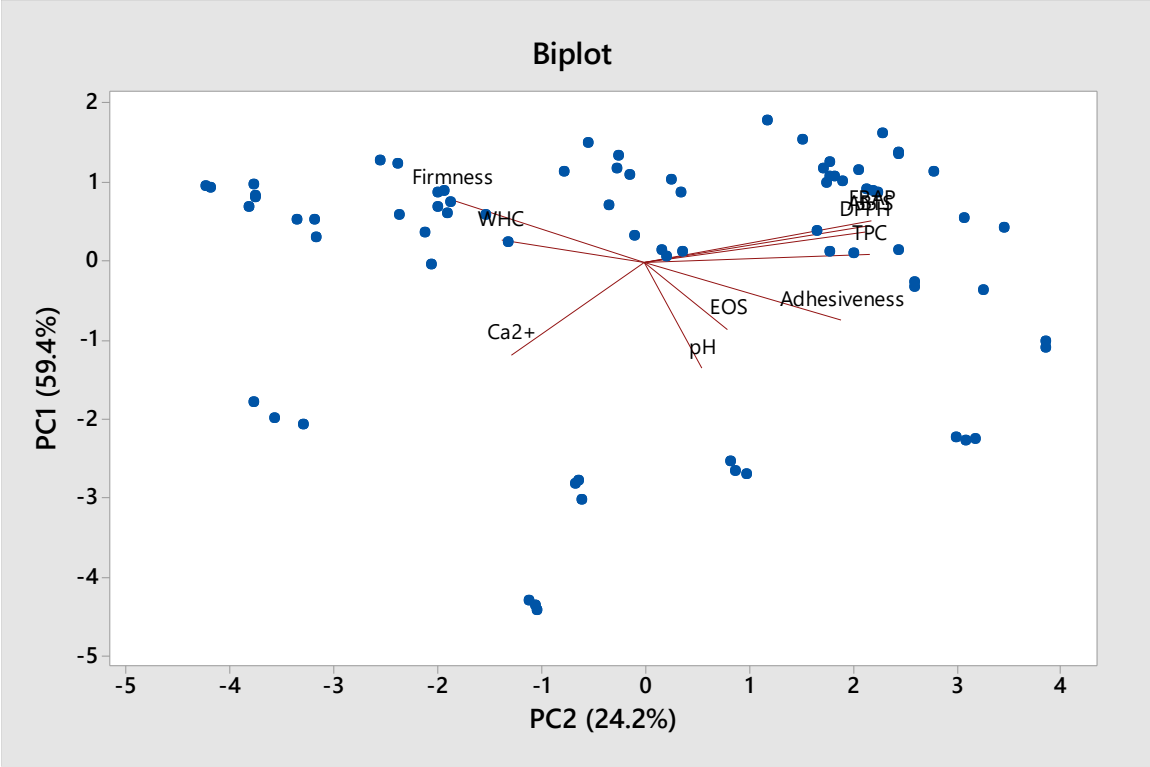

Supplement Figure S1. Biplot of the PCA
